# Supplementary material
Source: MDPI journal article supplement (https://www.mdpi.com/2073-4344/10/4/413)
Supplement: s1 [file s1]

*Supplementary Materials*

# **NaBiS<sub>2</sub> as Novel Indirect Bandgap Full Spectrum Photocatalyst: Synthesis and Application**

**Huanchun Wang** <sup>1,2,\*</sup>, **Zheng Xie** <sup>2,\*</sup>, **Xuanjun Wang** <sup>2,3</sup> and **Ying Jia** <sup>2</sup>

<sup>1</sup> Shaanxi Engineering Laboratory for Advanced Energy Technology, School of Materials Science & Engineering, Shaanxi Normal University, Xi'an, Shaanxi Province, 710119, People's Republic of China

<sup>2</sup> High-Tech Institute of Xi'an, Xi'an, Shaanxi Province, 710025, People's Republic of China; wangxj503@sina.com (X.W.); jyingsx@163.com (Y.J.)

<sup>3</sup> Shaanxi Key Laboratory of Special Fuel Chemistry and Material, Xi'an, Shaanxi Province, 710025, People's Republic of China

\* Correspondence: wang-hc12@tsinghua.org.cn (H.W.); xiezheng1003@163.com (Z.X.)

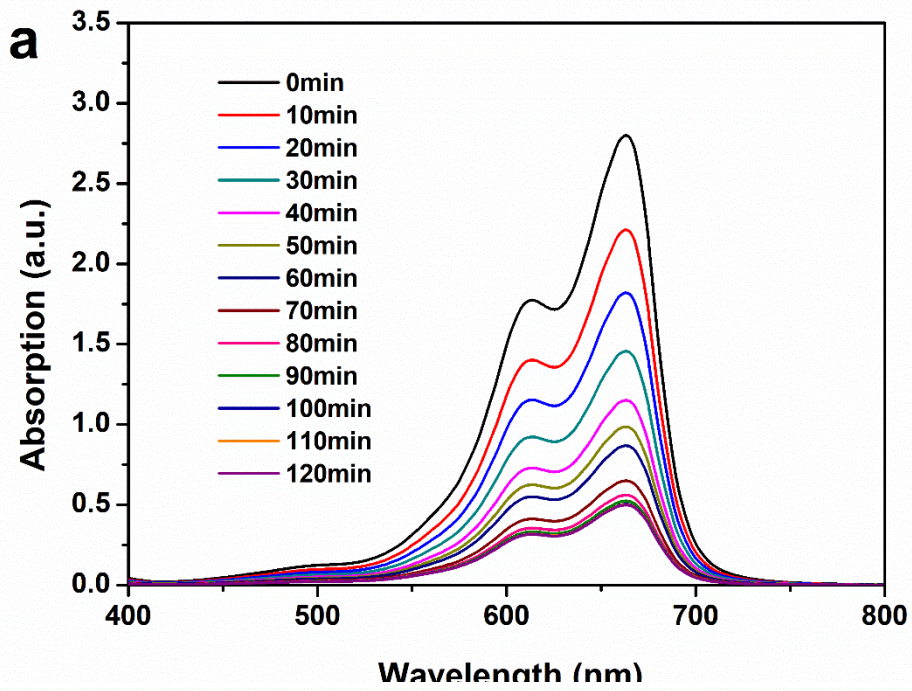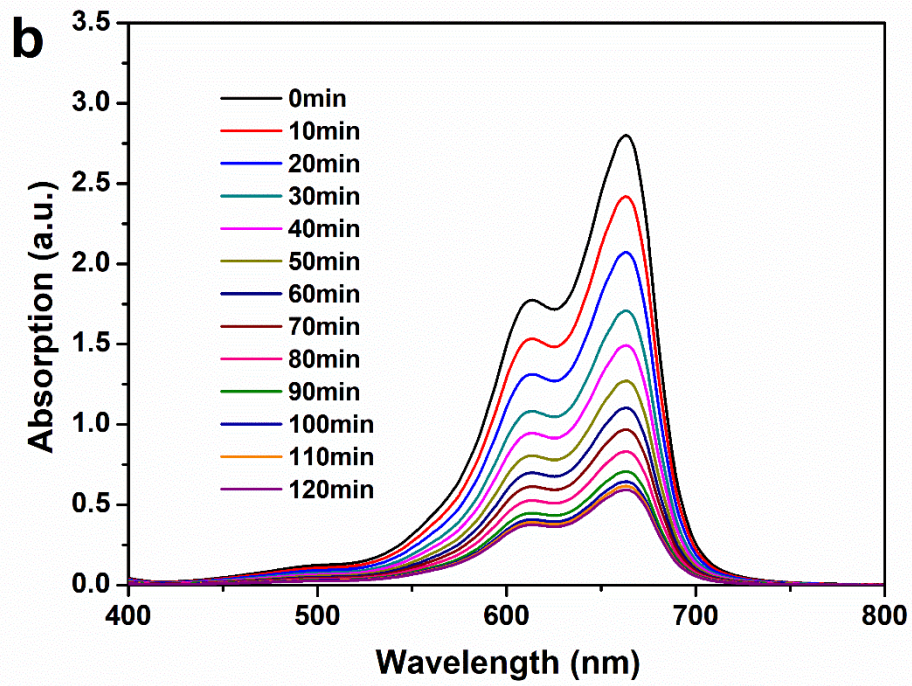

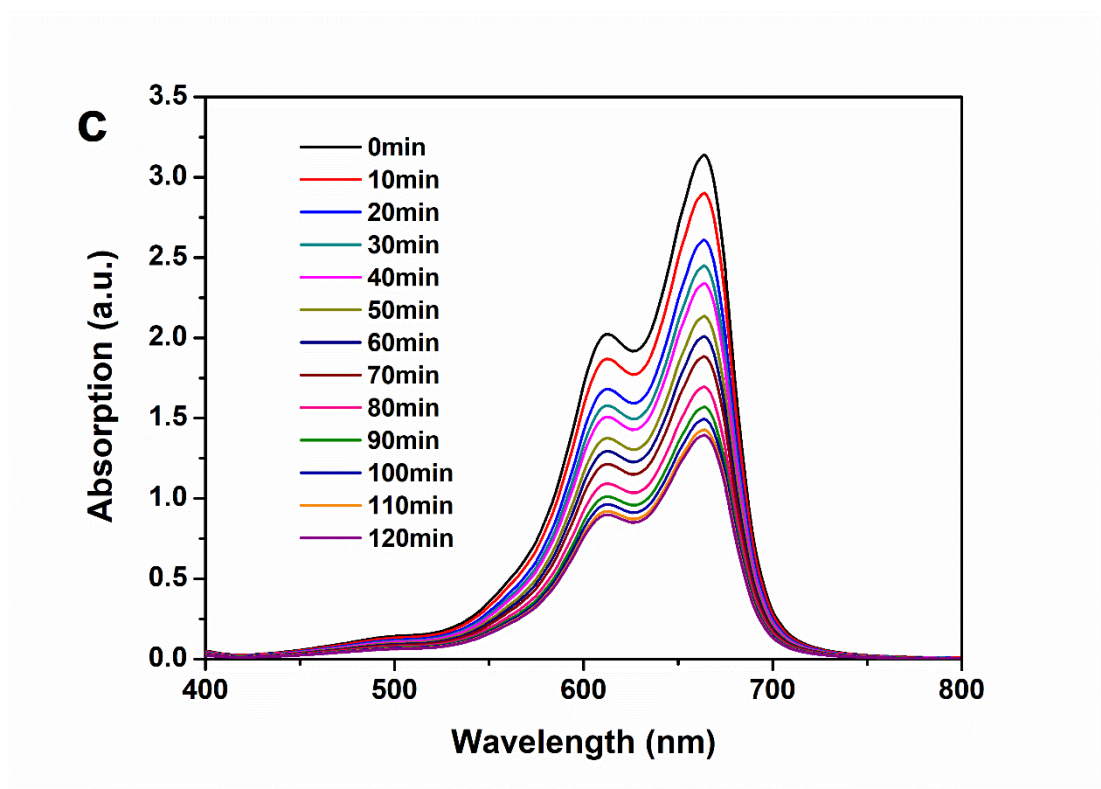

Figure S1. UV-vis absorption spectra curves of MB solution irradiated under (a) UV light; (b) visible light; (c) NIR light measured at interval times.

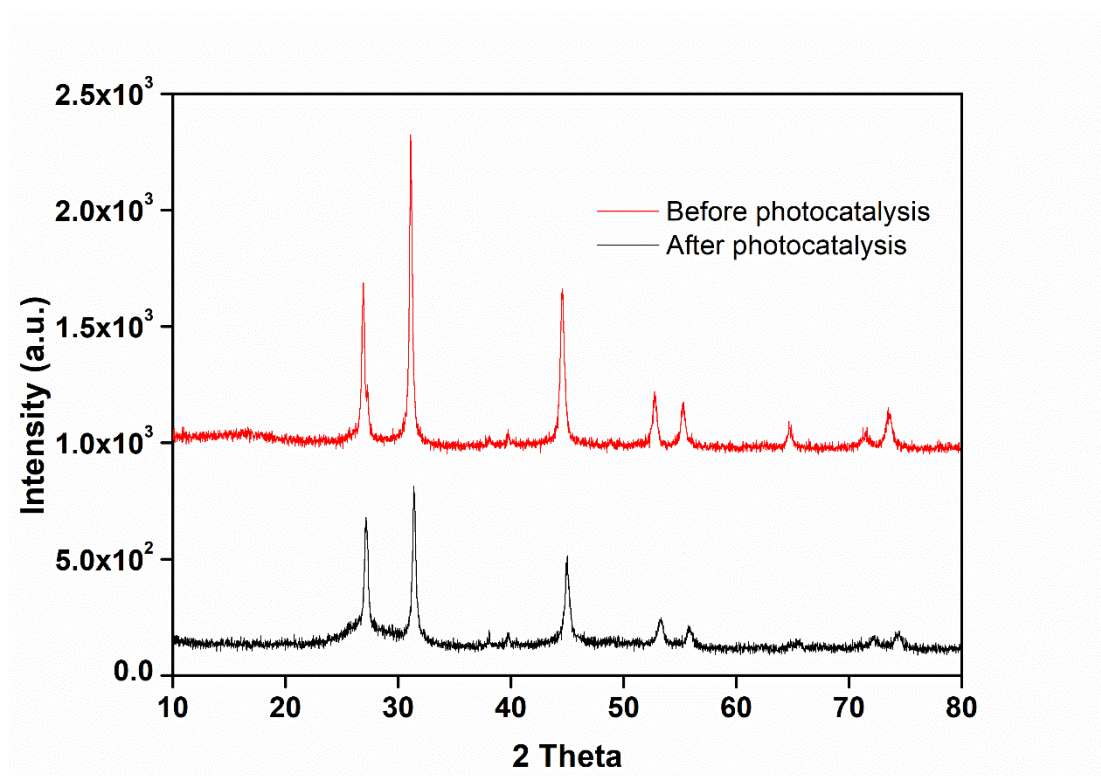

Figure S2. XRD patterns of NaBiS<sub>2</sub> before and after photocatalytic reaction.
